# Supplementary material
Source: Elsevier journal article supplement (https://www.sciencedirect.com/science/article/pii/S1138359318303757)
Supplement: mmc1 [file S1138359318303757:mmc1.pdf]

| Estudio                                                                                                                                                                                                                                                                         | Objetivos (eficacia)                                                                                                                                                                                                                                                                                                                                                                                                                                                               | Tratamiento recibido                                                                                                                                                                                                                                                                                                                                                             | Resultados objetivo compuesto (% eventos)                                                                                                                                                                                                                                                                                                                                                                                                                                                                                                                                                                                                     | ETEV durante el tratamiento (%)                                                                                                                                                                                                                                                                                                                                                                                                                                                                                                                                                                                                                                 | Extensión o recurrencia                                                 |
|---------------------------------------------------------------------------------------------------------------------------------------------------------------------------------------------------------------------------------------------------------------------------------|------------------------------------------------------------------------------------------------------------------------------------------------------------------------------------------------------------------------------------------------------------------------------------------------------------------------------------------------------------------------------------------------------------------------------------------------------------------------------------|----------------------------------------------------------------------------------------------------------------------------------------------------------------------------------------------------------------------------------------------------------------------------------------------------------------------------------------------------------------------------------|-----------------------------------------------------------------------------------------------------------------------------------------------------------------------------------------------------------------------------------------------------------------------------------------------------------------------------------------------------------------------------------------------------------------------------------------------------------------------------------------------------------------------------------------------------------------------------------------------------------------------------------------------|-----------------------------------------------------------------------------------------------------------------------------------------------------------------------------------------------------------------------------------------------------------------------------------------------------------------------------------------------------------------------------------------------------------------------------------------------------------------------------------------------------------------------------------------------------------------------------------------------------------------------------------------------------------------|-------------------------------------------------------------------------|
| <b>STENOX 2003</b><br>(N=427)<br><br>Aleatorizado.<br>Enoxaparina.<br>Participantes:<br>hospitalizados o no,<br>con TVS espontánea<br>aislada de $\geq 5$ cm en<br>ecografía; 156<br>hombres,<br>edad media 62 años.                                                            | <b>Primario:</b> Desarrollo de<br>TEP y/o TVP a los 12 días<br><br><b>Secundarios:</b> combinado<br>de recurrencia sintomática<br>y asintomática o extensión<br>de TVS (o ambos) a los 12<br>días y 3 meses; TEP y/o<br>TVP a los 12 días y 3<br>meses (97 días)                                                                                                                                                                                                                   | <b>HBPM dosis profilácticas</b><br>(40mg/d) 8-12 días (n=110)                                                                                                                                                                                                                                                                                                                    | <b>8,3</b><br>(p<0.001)                                                                                                                                                                                                                                                                                                                                                                                                                                                                                                                                                                                                                       | <b>0,9</b>                                                                                                                                                                                                                                                                                                                                                                                                                                                                                                                                                                                                                                                      | <b>8,2</b>                                                              |
|                                                                                                                                                                                                                                                                                 |                                                                                                                                                                                                                                                                                                                                                                                                                                                                                    | <b>HBPM dosis terapéuticas</b><br>(1,5mg/kg/d) 8-12 días(n= 106)                                                                                                                                                                                                                                                                                                                 | <b>6,9</b><br>(p<0.001)                                                                                                                                                                                                                                                                                                                                                                                                                                                                                                                                                                                                                       | <b>1,0</b>                                                                                                                                                                                                                                                                                                                                                                                                                                                                                                                                                                                                                                                      | <b>5,6</b>                                                              |
|                                                                                                                                                                                                                                                                                 |                                                                                                                                                                                                                                                                                                                                                                                                                                                                                    | <b>AINE:</b> Tenoxicam (20 mg/d)<br>8-12 días (n=99)                                                                                                                                                                                                                                                                                                                             | <b>14,9</b><br>(p<0.01)                                                                                                                                                                                                                                                                                                                                                                                                                                                                                                                                                                                                                       | <b>2,1</b>                                                                                                                                                                                                                                                                                                                                                                                                                                                                                                                                                                                                                                                      | <b>13,1</b>                                                             |
|                                                                                                                                                                                                                                                                                 |                                                                                                                                                                                                                                                                                                                                                                                                                                                                                    | <b>Placebo</b> 8-12 días (n=112)                                                                                                                                                                                                                                                                                                                                                 | <b>30,6</b>                                                                                                                                                                                                                                                                                                                                                                                                                                                                                                                                                                                                                                   | <b>3,6</b>                                                                                                                                                                                                                                                                                                                                                                                                                                                                                                                                                                                                                                                      | <b>29,4</b>                                                             |
|                                                                                                                                                                                                                                                                                 |                                                                                                                                                                                                                                                                                                                                                                                                                                                                                    | Todos los participantes usaron<br>vendas elásticas o medias desde<br>el primer día de tratamiento y<br>continuaron durante al menos<br>15 días.                                                                                                                                                                                                                                  | Estas diferencias se<br>mantuvieron en todos los<br>grupos de tratamiento<br>comparadas con placebo<br>a los 3 meses.                                                                                                                                                                                                                                                                                                                                                                                                                                                                                                                         | Estas diferencias no fueron<br>estadísticamente significativas al<br>comparar cada grupo con placebo                                                                                                                                                                                                                                                                                                                                                                                                                                                                                                                                                            |                                                                         |
| <b>VESALIO 2005</b><br>(N=164)<br>Aleatorizado.<br>Nadroparina<br>Participantes:<br>hospitalizados o no,<br>con TVS de vena<br>safena mayor que se<br>extiende hasta 3 cm<br>desde la unión<br>safena-femoral; 104<br>mujeres; edad media<br>63 años.                           | <b>Primario:</b> extensión<br>asintomática y sintomática<br>de TVS o ETEV (o ambos)<br>en un período de<br>seguimiento de 3 meses<br><br><b>Secundarios:</b> signos y<br>síntomas clínicos.                                                                                                                                                                                                                                                                                        | <b>HBPM dosis profilácticas</b><br>(0,3 ml= 2.850 UI)<br>30 días (n=81)                                                                                                                                                                                                                                                                                                          | <b>8,6</b>                                                                                                                                                                                                                                                                                                                                                                                                                                                                                                                                                                                                                                    | <b>0</b>                                                                                                                                                                                                                                                                                                                                                                                                                                                                                                                                                                                                                                                        | <b>6,2</b>                                                              |
|                                                                                                                                                                                                                                                                                 |                                                                                                                                                                                                                                                                                                                                                                                                                                                                                    | <b>HBPM dosis terapéuticas</b><br>ajustada al peso.<br>Dosis totales 10 días y mitad de<br>dosis 20 días. (n=83).                                                                                                                                                                                                                                                                | <b>7,2</b>                                                                                                                                                                                                                                                                                                                                                                                                                                                                                                                                                                                                                                    | <b>0</b>                                                                                                                                                                                                                                                                                                                                                                                                                                                                                                                                                                                                                                                        | <b>2,4</b>                                                              |
|                                                                                                                                                                                                                                                                                 |                                                                                                                                                                                                                                                                                                                                                                                                                                                                                    | No se usó aspirina o AINE<br>durante el estudio.                                                                                                                                                                                                                                                                                                                                 | Diferencia absoluta=1,4.<br>(P=0,74).                                                                                                                                                                                                                                                                                                                                                                                                                                                                                                                                                                                                         |                                                                                                                                                                                                                                                                                                                                                                                                                                                                                                                                                                                                                                                                 | Hubo<br>diferencia<br>significativa<br>en la<br>extensión del<br>trombo |
| <b>CALISTO 2010</b><br>(N=3002)<br><br>Aleatorizado<br>Participantes:<br>hospitalizados o<br>no, con TVS de $\geq 5$<br>cm de largo, sin<br>llegar al cayado<br>safenofemoral.<br>Edad media 57.1<br>años en grupo<br>fondaparinux y 56.<br>9 años en placebo.<br>1918 mujeres. | <b>Primario:</b> compuesto de<br>muerte por cualquier<br>causa, TEP o, TVP<br>sintomática, extensión<br>sintomática a la unión<br>safenofemoral o<br>recurrencia sintomática de<br>la TVS el día 47.<br><br><b>Secundarios:</b> resultado de<br>eficacia primaria<br>compuesto hasta el día 77<br>y los siguientes resultados<br>hasta el día 47 y 77: cada<br>componente del resultado<br>de eficacia primario, el<br>compuesto de TEP o TVP<br>sintomática y cirugía para<br>TVS | Placebo 45 días (n=1500)                                                                                                                                                                                                                                                                                                                                                         | <b>5,9</b>                                                                                                                                                                                                                                                                                                                                                                                                                                                                                                                                                                                                                                    | <b>1,3</b>                                                                                                                                                                                                                                                                                                                                                                                                                                                                                                                                                                                                                                                      | <b>5</b>                                                                |
|                                                                                                                                                                                                                                                                                 |                                                                                                                                                                                                                                                                                                                                                                                                                                                                                    | Fondaparinux dosis<br>profilácticas (2,5 mg/d)<br>45 días (n=1502)                                                                                                                                                                                                                                                                                                               | <b>0,9</b>                                                                                                                                                                                                                                                                                                                                                                                                                                                                                                                                                                                                                                    | <b>0,2</b>                                                                                                                                                                                                                                                                                                                                                                                                                                                                                                                                                                                                                                                      | <b>0,6</b>                                                              |
|                                                                                                                                                                                                                                                                                 |                                                                                                                                                                                                                                                                                                                                                                                                                                                                                    | En el grupo fondaparinux, el<br>83.0% de los participantes<br>recibieron medias de<br>compresión, 41.5% AINE<br>tópicos, 3.9% anticoagulantes<br>tópicos, 2.1% AINE o<br>inhibidores COX-2, 1.1%<br>anticoagulantes orales o<br>parenterales, 21.4% aspirina<br>u otros agentes<br>antiplaquetarios.<br>Los valores correspondientes<br>en el grupo placebo fueron<br>similares. | <b>Factores de riesgo<br/>independientes de<br/>complicaciones<br/>tromboembólicas<br/>posteriores en pacientes<br/>con TVS:</b> Sexo<br>masculino, insuficiencia<br>venosa grave, TVS en<br>venas no varicosas,<br>historia de TVP o TEP e<br>historia de cáncer.<br><b>Tasas de eventos</b> más<br>altas en pacientes >75<br>años, peso >100 kg y<br>aquellos con un<br>aclaramiento de<br>creatinina por debajo de<br>50 ml min <sup>-1</sup> , historia de<br>TVP, TEP o TVS o TVS<br>múltiple, TVS por<br>encima de la rodilla,<br>TVS que involucra a la<br>Safena mayor, o<br>extensión a <10 cm<br>desde el cayado safeno-<br>femoral | Reducción del riesgo relativo con<br>fondaparinux=85%; p <0,001).Tasa<br>de muerte idéntica en ambos grupos<br>(0,1%). La incidencia de cada<br>componente del resultado primario de<br>eficacia, excepto la muerte, se redujo<br>significativamente en el grupo<br>fondaparinux en comparación con el<br>grupo placebo. Tasa de hemorragia<br>mayor idéntica en ambos grupos, con<br>un episodio en cada grupo. Hubo una<br>reducción del 85% del riesgo relativo<br>en el resultado compuesto, que fue<br>evidente durante los primeros días<br>después del tratamiento y se mantuvo<br>hasta el día 77, o 30 días después del<br>cese de la anticoagulación. |                                                                         |
| <b>STEFLEX 2012</b><br>(N=664).<br>Parnaparina<br>Aleatorizado<br>664 pacientes<br>ambulatorios<br>consecutivos con<br>TVS $\geq 4$ cm de<br>longitud de venas                                                                                                                  | <b>- Primario:</b> compuesto de<br>TVP sintomática y<br>asintomática, TEP<br>sintomática y recidiva,<br>recurrencia de TVS<br>sintomática o asintomática,<br>o una combinación en los<br>primeros 33 días<br><br><b>- Secundarios:</b> reducción<br>de los síntomas locales<br>durante el tratamiento,                                                                                                                                                                             | <b>GRUPO A:</b> HBPM dosis<br>intermedias (8500UI/d) 10 días<br>seguidas de placebo 20 días<br>(n=212).                                                                                                                                                                                                                                                                          | <b>15,6</b>                                                                                                                                                                                                                                                                                                                                                                                                                                                                                                                                                                                                                                   | <b>4,6</b>                                                                                                                                                                                                                                                                                                                                                                                                                                                                                                                                                                                                                                                      | <b>10,6</b>                                                             |
|                                                                                                                                                                                                                                                                                 |                                                                                                                                                                                                                                                                                                                                                                                                                                                                                    | <b>GRUPO B:</b> HBPM dosis<br>intermedias (8500UI/d) 10 días<br>seguidas de 6400UI/d 20 días<br>(n=219)                                                                                                                                                                                                                                                                          | <b>1,8</b>                                                                                                                                                                                                                                                                                                                                                                                                                                                                                                                                                                                                                                    | <b>0,4</b>                                                                                                                                                                                                                                                                                                                                                                                                                                                                                                                                                                                                                                                      | <b>1,3</b>                                                              |
|                                                                                                                                                                                                                                                                                 |                                                                                                                                                                                                                                                                                                                                                                                                                                                                                    | <b>GRUPO C:</b> HBPM dosis<br>profilácticas (4250UI/d) 30 días<br>(n=217)                                                                                                                                                                                                                                                                                                        | <b>7,4</b>                                                                                                                                                                                                                                                                                                                                                                                                                                                                                                                                                                                                                                    | <b>1,3</b>                                                                                                                                                                                                                                                                                                                                                                                                                                                                                                                                                                                                                                                      | <b>5,8</b>                                                              |

|                                                                                                                                                                                                                                                                                                                                                                                            |                                                                                                                                                                                                                                                                                                                                                                                                                                                                                                                                                                                                                                                                                                           |                                                                                                                                                                                                                                   |                                                                                                                                                                                                                                                                                                                                                                                                                                |                              |                                                                         |
|--------------------------------------------------------------------------------------------------------------------------------------------------------------------------------------------------------------------------------------------------------------------------------------------------------------------------------------------------------------------------------------------|-----------------------------------------------------------------------------------------------------------------------------------------------------------------------------------------------------------------------------------------------------------------------------------------------------------------------------------------------------------------------------------------------------------------------------------------------------------------------------------------------------------------------------------------------------------------------------------------------------------------------------------------------------------------------------------------------------------|-----------------------------------------------------------------------------------------------------------------------------------------------------------------------------------------------------------------------------------|--------------------------------------------------------------------------------------------------------------------------------------------------------------------------------------------------------------------------------------------------------------------------------------------------------------------------------------------------------------------------------------------------------------------------------|------------------------------|-------------------------------------------------------------------------|
| <p>safenas o sus colaterales. Edad media 69 años; hombres 37%</p>                                                                                                                                                                                                                                                                                                                          | <p>criterio combinado de eficacia durante un seguimiento de 93 días después del inicio del tratamiento</p>                                                                                                                                                                                                                                                                                                                                                                                                                                                                                                                                                                                                | <p>Los participantes usaron medias elásticas de 20-40 mmHg en el tobillo, a menos que estuviera contraindicado. Los AINEs orales o tópicos se permitieron solo 4 días.</p>                                                        | <p>Diferencia significativa en la tasa de eventos de resultado primarios entre los grupos que recibieron HBPM de dosis intermedia durante 10 días (11,3%) y HBPM de dosis profiláctica durante 30 días (5,7%) en comparación con HBPM de dosis intermedia durante 30 días (1,5%). Además, la diferencia en la tasa de resultados primarios entre los grupos A y B fue altamente significativa (<math>p &lt; 0,0001</math>)</p> |                              |                                                                         |
| <p><b>SURPRISE 2017</b> (N=435)</p> <p>Aleatorizado. TVS sintomática de 5 cm o más de tamaño, encima de la rodilla con al menos uno de los siguientes factores de riesgo de complicaciones tromboembólicas: &gt; 65 años, sexo masculino, TVS previa o TVP o TEP, cáncer activo o antecedentes de cáncer, enfermedad autoinmune o afectación de venas no varicosas. Edad media 61 años</p> | <p>Primario incidencia del compuesto: muerte por cualquier causa, TVP y/o TEP, extensión proximal sintomática de la TVS hacia la unión safeno-femoral, o TVS sintomática recurrente en los 45 días de inicio del tratamiento.</p> <p><u>Secundarios:</u> resultado de eficacia primaria compuesto dentro de los 90 días del inicio del tratamiento, e incidencia de cada componente del resultado de eficacia primaria a los 45 y 90 días; presencia de ETEV en los días 45 y 90 como un compuesto de TEP y/o TVP proximal o muerte relacionada con ETEV; y cirugía para la trombosis de vena superficial dentro de los 45 y 90 días posteriores al inicio del tratamiento farmacológico del estudio.</p> | <p>Rivaroxabán 10 mg/día<br/>45 días</p>                                                                                                                                                                                          | <p>3</p>                                                                                                                                                                                                                                                                                                                                                                                                                       | <p>TVP: 1<br/>TEP: 0</p>     | <p>Extensión: 0<br/>Recurrencia: 2</p>                                  |
|                                                                                                                                                                                                                                                                                                                                                                                            |                                                                                                                                                                                                                                                                                                                                                                                                                                                                                                                                                                                                                                                                                                           | <p>Fondaparinux 2,5 mg/día<br/>45 días</p>                                                                                                                                                                                        | <p>2</p>                                                                                                                                                                                                                                                                                                                                                                                                                       | <p>TVP: &lt;1<br/>TEP: 0</p> | <p>Extensión: 0<br/>Recurrencia: 1</p>                                  |
|                                                                                                                                                                                                                                                                                                                                                                                            |                                                                                                                                                                                                                                                                                                                                                                                                                                                                                                                                                                                                                                                                                                           | <p>Rivaroxaban resultó ser no inferior a fondaparinux en la prevención del resultado compuesto de TVP o TEP sintomática. progresión o recurrencia de TSV y mortalidad por todas las causas después de 45 días de tratamiento.</p> |                                                                                                                                                                                                                                                                                                                                                                                                                                |                              |                                                                         |
| <p><b>Rathbun et al.</b> (2012) (N= 72). Dalteparina Aleatorizado controlado con placebo. 3 meses de seguimiento</p>                                                                                                                                                                                                                                                                       | <p>Objetivo primario: Extensión del trombo o nueva ETEV sintomática durante el período de seguimiento a los 14 días y a los 3 meses. Objetivo 2º: Reducción dolor</p>                                                                                                                                                                                                                                                                                                                                                                                                                                                                                                                                     | <p>Dalteparina 200 UI/kg/d 1ª dosis seguida de 10.000UI/d durante 6 días</p>                                                                                                                                                      | <p>---</p>                                                                                                                                                                                                                                                                                                                                                                                                                     | <p>0</p>                     | <p><b>0</b> (14 días)<br/>(p 0.05)<br/>10,8 (3 meses)<br/>(p 0.51)</p>  |
|                                                                                                                                                                                                                                                                                                                                                                                            |                                                                                                                                                                                                                                                                                                                                                                                                                                                                                                                                                                                                                                                                                                           | <p>Ibuprofeno 800 mg/8h 7 días</p>                                                                                                                                                                                                | <p>---</p>                                                                                                                                                                                                                                                                                                                                                                                                                     | <p>0</p>                     | <p><b>11,4</b> (14 días)<br/>(p 0.05)<br/>17 (3 meses)<br/>(p 0,51)</p> |

Tabla 3.- Resultados de eficacia en estudios con anticoagulantes para la trombosis venosa superficial. Modificado de Scovell et al<sup>2,17</sup>. Dinisio et al<sup>8</sup>, Beyer-Westendorf<sup>9</sup>, DECOUSUS et al<sup>12</sup>.
